# Supplementary material for: A Chemical Activity Approach to Exposure and Risk Assessment of Chemicals
Source: PubMed Central journal article supplement (PMC5994922; doi:10.1002/etc.4091), 2018-05
Supplement: NIHMS971791-supplement.pdf [file NIHMS971791-supplement.pdf]

3 **Supporting Information**

4 **A Chemical Activity Approach to Exposure and Risk Assessment of Chemicals**

5  
6 Frank A.P.C. Gobas†\*, Philipp Mayer‡, Thomas F. Parkerton§, Robert M. Burgess||, Dik van de  
7 Meent#, Todd Gouin††

8  
9 † School of Resource and Environmental Management, Simon Fraser University, Burnaby,  
10 British Columbia, Canada V5A 1S6

11 ‡ DTU Environment, Department of Environmental Engineering, Technical University of  
12 Denmark

13 § Toxicology & Environmental Science Division, ExxonMobil Biomedical Sciences Inc.,  
14 Houston, Texas, USA

15 || U.S. Environmental Protection Agency, ORD/NHEERL, Atlantic Ecology Division, ,  
16 Narragansett, Rhode Island, USA

17 #Radboud University Nijmegen, Department of Environmental Science  
18 P.O. box 9010, 6500GL Nijmegen, The Netherlands

19 †† TG Environmental Research, Sharnbrook, Bedfordshire, United Kingdom

20  
21 \*Address correspondence to gobas@sfu.ca  
22

23

## Tables

24

25 Table S1: Summary of recent literature studies (2012 – present) where chemical activity  
26 gradients between media were characterized using passive sampling measurements.

27

| <b>Passive Sampler</b>       | <b>Environmental Gradient Investigated</b>                      | <b>Location and Date</b>                    | <b>Contaminants</b>                             | <b>References</b> |
|------------------------------|-----------------------------------------------------------------|---------------------------------------------|-------------------------------------------------|-------------------|
| LDPE                         | Surface waters – overlying atmosphere                           | Newark Bay (New Jersey, USA) 2008 - 2009    | Dioxins/furans                                  | S1                |
| PDMS                         | Water column – sediment interstitial water - biota              | Stockholm Archipelago 2009-2010             | PCBs                                            | S2                |
| LDPE                         | Water column (surface and bottom) – sediment interstitial water | Narragansett Bay (Rhode Island, USA) 2009   | PBDEs                                           | S3                |
| LDPE                         | Water column – sediment interstitial water                      | Hailing Bay (South China) 2012              | DDTs                                            | S4                |
| LDPE                         | Surface waters – overlying atmosphere                           | Tropical Atlantic Ocean 2009                | PBDEs                                           | S5                |
| LDPE, POM, PDMS              | Water column – sediment interstitial water                      | Pacific Coast (California, USA) 2011        | PCBs and DDTs                                   | S6                |
| PDMS                         | Sediment interstitial water – biota                             | Lake Ången (Sweden) 2012                    | PCBs and HCBs                                   | S7,S8             |
| LDPE                         | Water column – sediment interstitial water - biota              | Passaic River (New Jersey, USA) 2011 - 2012 | PCBs, PAHs and dioxins/furans                   | S9                |
| LDPE                         | Surface waters – overlying atmosphere                           | Lower Great Lakes 2011                      | Organochlorine pesticides                       | S10               |
| LDPE                         | Surface waters – overlying atmosphere                           | Lake Erie and Lake Ontario 2011             | PCBs                                            | S11               |
| Polyurethane/Silicone rubber | Surface waters – overlying atmosphere                           | Aegean Sea, 2012                            | PAHs, PCBs, PBDEs and organochlorine pesticides | S12               |
| PDMS                         | Water column – sediment interstitial water                      | Baltic Sea 2008                             | PAHs                                            | S13               |
| LDPE and PDMS                | Water column – sediment interstitial water - biota              | Lake Kernaalanjarvi (Southern Finland) 2010 | PCBs                                            | S14               |
| LDPE                         | Surface waters – overlying atmosphere                           | Lake Superior 2011                          | PAHs and PBDEs                                  | S15               |
| LDPE                         | Surface waters – overlying atmosphere                           | Gulf of Mexico 2010-2011                    | PAHs and oxygenated PAHs                        | S16               |
| LDPE                         | Surface waters – overlying atmosphere                           | South and southeast Brazil                  | Organochlorine pesticides                       | S17               |

|  |  |      |  |  |
|--|--|------|--|--|
|  |  | 2012 |  |  |
|--|--|------|--|--|

28  
29  
30  
31

32

### 33 **Supporting Information Chemical Activity Calculations in Toxicity Tests**

34

35 Ding et al. [S18,S19] expressed 10 d toxicity tests for *Chironomous dilutes* and *Hyalella azteca*  
36 in terms of concentrations on 10 micron polydimethylsiloxane (PDMS) coated fibers that were  
37 equilibrated with test media samples collected from various treatments with different pesticide  
38 concentrations for up to 60 days. In addition, effects were also related to the lipid normalized  
39 tissue concentrations in exposed test organisms. To calculate chemical activities from the  
40 equilibrium concentrations of the test chemicals in PDMS and lipids, sub-cooled liquid aqueous  
41 solubilities ( $S_{W,L}$ ), PDMS-water ( $K_{PDMS}$ ) and octanol-water partition ( $K_{OW}$ ) coefficients for the  
42 four substances were obtained from the literature. For DDT and related compounds,  $S_{W,L}$  and  
43  $K_{OW}$  were taken from the critical review by Shen and Wania [S20] and  $K_{PDMS}$  from the recent  
44 work by Eganhouse [S21]. For permethrin, experimental water solubility (6  $\mu\text{g/L}$ ) and log  $K_{ow}$   
45 (6.5) measurements were obtained from EpiSuite [S22]. The physico-chemical property data  
46 apply to a temperature 25 °C which was close to the 23°C temperature used in toxicity  
47 experiments. Since permethrin is a solid at room temperature (melting point = 34 °C), equation 5  
48 was applied to calculate the subcooled liquid solubility of permethrin in water state, i.e. 7.4  $\mu\text{g/L}$ .  
49 The  $K_{PDMS}$  value for permethrin was selected from the critical review by [S23]. The Activity  
50 Calculator [S24] was used to convert concentrations in octanol and PDMS into chemical  
51 activities. The chemical properties used in the chemical activity calculations are listed in Tables  
52 S1-S3. The calculations assume that the activity coefficient of the test chemicals in octanol can  
53 be used to approximate the activity coefficient in the organism's lipids. To calculate the chemical  
54 activities of the test chemical in PDMS, the log  $K_{PDMS}$  was used instead of log  $K_{OW}$  in the

55 Activity calculator. The toxicity data expressed in terms of PDMS or lipid normalized  
56 concentrations are reproduced from [S18] and [S19] in Table S3. The calculated chemical  
57 activities are summarized in Table S3 and plotted in Figure 4 in the main text.

58

59

60 Table S1: Input parameters used for the chemical activity calculations of experimental data

61 presented in Ding et al. [S18,S19].

**Chemical Activity Calculations for PDMS**

|                                                                                     |          |          |          |            |
|-------------------------------------------------------------------------------------|----------|----------|----------|------------|
| Chemical Name:                                                                      | DDT      | DDD      | DDE      | Permethrin |
| Environmental Temperature (°C)                                                      | 23       | 23       | 23       | 23         |
| Standard Temperature (°C)                                                           | 25       | 25       | 25       | 25         |
| Molecular Weight (g/mol)                                                            | 354.49   | 320.034  | 318.02   | 391.28     |
| log Kow                                                                             | 5.76     | 5.1      | 6.05     | 5.59       |
| Aqueous Solubility at Standard temperature (mol.m <sup>-3</sup> )                   | 4.20E-07 | 2.30E-06 | 7.89E-07 | 2.04E-08   |
| Vapor Pressure at Standard temperature (Pa)                                         | na       | na       | na       | na         |
| Melting Point (°C)                                                                  | 0        | 0        | 0        | 0          |
| Enthalpy of Solution for the liquid or subcooled liquid (kJ.mol <sup>-1</sup> )     | 0        | 0        | 0        | 0          |
| Enthalpy of Vaporization for the liquid or subcooled liquid (kJ.mol <sup>-1</sup> ) | 0        | 0        | 0        | 0          |

**Chemical Activity Calculations for Octanol**

|                                                                                     |            |            |            |                   |
|-------------------------------------------------------------------------------------|------------|------------|------------|-------------------|
| Chemical Name:                                                                      | <b>DDT</b> | <b>DDD</b> | <b>DDE</b> | <b>Permethrin</b> |
| Environmental Temperature (°C)                                                      | 23         | 23         | 23         | 23                |
| Standard Temperature (°C)                                                           | 25         | 25         | 25         | 25                |
| Molecular Weight (g/mol)                                                            | 354.49     | 320.034    | 318.02     | 391.28            |
| log Kow                                                                             | 6.39       | 6.33       | 6.93       | 6.5               |
| Aqueous Solubility at Standard temperature (mol.m <sup>-3</sup> )                   | 4.20E-07   | 2.30E-06   | 7.89E-07   | 2.04E-08          |
| Vapor Pressure at Standard temperature (Pa)                                         | na         | na         | na         | na                |
| Melting Point (°C)                                                                  | 0          | 0          | 0          | 0                 |
| Enthalpy of Solution for the liquid or subcooled liquid (kJ.mol <sup>-1</sup> )     | 0          | 0          | 0          | 0                 |
| Enthalpy of Vaporization for the liquid or subcooled liquid (kJ.mol <sup>-1</sup> ) | 0          | 0          | 0          | 0                 |

62

63

64 Table S2. Summary of Test Substance Properties at 25 °C, including molecular weight,  
65 subcooled liquid solubility in water ( $S_{w,L}$ ) and the logarithm of the partition coefficients of the  
66 chemical between octanol and water ( $K_{OW}$ ) and between PDMS and water ( $K_{PDMS}$ ).

67

68

| Substance  | CAS#       | Molecular Weight (g/mol) | $S_{w,L}$ ( $\mu\text{g/L}$ ) | Log $K_{OW}$ ( $L_{\text{water}}/L_{\text{octanol}}$ ) | Log $K_{PDMS}$ ( $L_{\text{water}}/L_{\text{pdms}}$ ) |
|------------|------------|--------------------------|-------------------------------|--------------------------------------------------------|-------------------------------------------------------|
| pp-DDT     | 50-29-3    | 354.49                   | 149                           | 6.39                                                   | 5.76                                                  |
| pp-DDD     | 72-54-8    | 320.034                  | 736                           | 6.33                                                   | 5.10                                                  |
| pp-DDE     | 72-54-9    | 318.02                   | 251                           | 6.93                                                   | 6.05                                                  |
| Permethrin | 52645-53-1 | 391.28                   | 8                             | 6.50                                                   | 5.59                                                  |

69

70

71

72



73 Table S3. Toxicity data expressed in terms of fiber and lipid normalized organism  
 74 concentrations and corresponding chemical activities as calculated by the Activity Calculator  
 75 Version 1.2\*.  
 76

|            | <i>Chironomus</i>                         | <i>Hyaella</i>                            | <i>Chironomus</i>     | <i>Hyaella</i>        | <i>Chironomus</i>               | <i>Hyaella</i>                  | <i>Chironomus</i>     | <i>Hyaella</i>        |
|------------|-------------------------------------------|-------------------------------------------|-----------------------|-----------------------|---------------------------------|---------------------------------|-----------------------|-----------------------|
| Substance  | 10 d EC <sub>50</sub>                     | 10 d LC <sub>50</sub>                     | 10 d EA <sub>50</sub> | 10 d LA <sub>50</sub> | 10 d ER <sub>50</sub>           | 10 d LR <sub>50</sub>           | 10 d EA <sub>50</sub> | 10 d LA <sub>50</sub> |
|            | ( $\mu\text{g}/\text{ml}_{\text{PDMS}}$ ) | ( $\mu\text{g}/\text{ml}_{\text{PDMS}}$ ) | (a)                   | (a)                   | ( $\mu\text{g}/\text{glipid}$ ) | ( $\mu\text{g}/\text{glipid}$ ) | (a)                   | (a)                   |
| pp-DDT     | 92.5                                      | 24.2                                      | 1.07E-03              | 2.82E-04              | 79                              | 16                              | 2.16E-04              | 4.38E-05              |
| pp-DDD     | 32.5                                      | 42.4                                      | 3.51E-04              | 4.58E-04              | 33                              | 175                             | 2.10E-05              | 1.11E-04              |
| pp-DDE     | 7992                                      | 3285                                      | 2.84E-02              | 1.17E-02              | 1989                            | 454                             | 9.31E-04              | 2.13E-04              |
| Permethrin | 7.8                                       | 2.3                                       | 2.51E-03              | 7.41E-04              | 0.27                            | 0.24                            | 1.07E-05              | 9.51E-06              |

77  
 78 \*For the calculations of the chemical activities in the Activity Calculator, we used na (not applicable) for the vapor  
 79 pressure, 0°C for the melting point (because the aqueous solubility applies to the subcooled liquid and hence the  
 80 calculations need to treat the chemical as a liquid), and environmental temperature of 23°C and a standard  
 81 temperature of 25°C.

82  
 83 **References**

84  
 85 S1.Friedman CL, MG Cantwell, R Lohmann. 2012. Passive sampling provides evidence for  
 86 Newark Bay as a source of polychlorinated dibenzo-p-dioxins and furans to the New York/New  
 87 Jersey, USA, atmosphere. Environ Toxicol Chem 31(2):253-261.  
 88  
 89 S2.Jahnke A, P Mayer, MS McLachlan. 2012. Sensitive Equilibrium Sampling To Study  
 90 Polychlorinated Biphenyl Disposition in Baltic Sea Sediment. Environ Sci Technol  
 91 46(18):10114-10122.  
 92  
 93 S3.Sacks VP, R Lohmann. 2012. Freely dissolved PBDEs in water and porewater of an urban  
 94 estuary. Environ Pollut 162:287-293.  
 95  
 96 S4.Liu H-H, L Bao, K Zhang, et al. 2013. Novel Passive Sampling Device for Measuring  
 97 Sediment Water Diffusion Fluxes of Hydrophobic Organic Chemicals. Environ Sci Technol  
 98 47(17):9866-9873.  
 99

100 S5.Lohmann R, J Klanova, P Kukucka, et al. 2013. Concentrations, Fluxes, and Residence Time  
101 of PBDEs Across the Tropical Atlantic Ocean. *Environ Sci Technol* 47(24):13967-13975.  
102

103 S6.Fernandez LA, W Lao, K Maruva, et al. 2014. Calculating the Diffusive Flux of Persistent  
104 Organic Pollutants between Sediments and the Water Column on the Palos Verdes Shelf  
105 Superfund Site Using Polymeric Passive Samplers. *Environ Sci Technol* 48(7):3925-3934.  
106

107 S7.Jahnke A, M MacLeod, H Wickström, P Mayer. 2014. Equilibrium Sampling to Determine  
108 the Thermodynamic Potential for Bioaccumulation of Persistent Organic Pollutants from  
109 Sediment. *Environ Sci Technol* 48(19):11352-11359.  
110

111 S8. Jahnke A, P Mayer, MS. McLachlan, H Wickström, D Gilbert, M MacLeod. 2014. Silicone  
112 passive equilibrium samplers as ‘chemometers’ in eels and sediments of a Swedish lake.  
113 *Environ. Sci.: Processes Impacts*, 2014, 16, 464.  
114

115 S9.Khairy MA, MP Weinstein, R Lohmann. 2014. Trophodynamic Behavior of Hydrophobic  
116 Organic Contaminants in the Aquatic Food Web of a Tidal River. *Environ Sci Technol*  
117 48(21):12533-12542.  
118

119 S10.Khairy M, D Muir, C Teixeira, et al. 2014. Spatial Trends, Sources, and Air Water  
120 Exchange of Organochlorine Pesticides in the Great Lakes Basin Using Low Density  
121 Polyethylene Passive Samplers. *Environ Sci Technol* 48(16):9315-9324.  
122

123 S11.Khairy M, D Muir, C Teixeira, et al. 2015. Spatial Distribution, Air Water Fugacity Ratios  
124 and Source Apportionment of Polychlorinated Biphenyls in the Lower Great Lakes Basin.  
125 *Environ Sci Technol* 49(23):13787-13797.  
126

127 S12.Lammel G, O Audy, A Besis, et al. 2015. Air and seawater pollution and air sea gas  
128 exchange of persistent toxic substances in the Aegean Sea: spatial trends of PAHs, PCBs, OCPs  
129 and PBDEs. *Environ Sci Pollut R* 22(15):11301-11313.  
130

131 S13.Lang S-C, A Hursthouse, P Mayer, et al. 2015. Equilibrium passive sampling as a tool to  
132 study polycyclic aromatic hydrocarbons in Baltic Sea sediment pore-water systems. 2015. *Mar*  
133 *Pollut Bull* 101(1):296-303.  
134

135 S14.Mäenpää K, MT Leppanen, K Figueiredo, et al. 2015. Fate of polychlorinated biphenyls in a  
136 contaminated lake ecosystem: Combining equilibrium passive sampling of sediment and water  
137 with total concentration measurements of biota. 2015. *Environ Toxicol Chem* 34(11):2463-2474.  
138

139 S15.Ruge Z, D Muir, P Helm, et al. 2015. Concentrations, Trends and Air Water Exchange of  
140 PAHs and PBDEs Derived from Passive Samplers in Lake Superior in 2011. *Environ Sci*  
141 *Technol* 49(23):13777-13786.  
142

143 S16.Tidwell LG, SE Allan, SG O’Connell, et al. 2015. Polycyclic Aromatic Hydrocarbon (PAH)  
144 and Oxygenated PAH (OPAH) Air Water Exchange during the Deepwater Horizon Oil Spill.  
145 *Environ Sci Technol* 49(1):141-149.

146  
147 S17.Meire RO, M Khairy, AC Targino, et al. 2016. Use of passive samplers to detect  
148 organochlorine pesticides in air and water at wetland mountain region sites (S-SE Brazil).  
149 Chemosphere 144:2175-2182.  
150  
151 S18.Ding Y, PF Landrum, JY Amanda D Hartwood, MJ. Lydy, (2012). Use of solid phase  
152 microextraction to estimate toxicity: Relating fiber concentrations to toxicity—part I. *Environ.*  
153 *Toxicol. Chem.* 31 (9), 2159–2167.  
154  
155 S19.Ding Y, PF Landrum, JY Amanda D Hartwood, MJ. Lydy, (2012). Use of solid phase  
156 microextraction to estimate toxicity: Relating fiber concentrations to body residues—part II.  
157 *Environ. Toxicol. Chem.* 31 (9), 2168–2174.  
158  
159 S20.Shen, L, F Wania 2005). Compilation, Evaluation and Selection of Physical-Chemical  
160 Property Data for Organichlorine Pesticides, *J. Chem. Eng. Data* 50:742-768.  
161  
162 S21.Eganhouse, RP 2016. Determination of polydimethylsiloxane-water partition coefficients for  
163 ten 1-chloro[2,2,2-trichloro-1-(-4-chlorophenyl)ethyl]benzene-related compounds and twelve  
164 polychlorinated biphenyls using gas chromatography/mass spectroscopy, *J. Chrom. A* 1438:226-  
165 235.  
166  
167 S22.US EPA. [2012]. Estimation Programs Interface Suite™ for Microsoft® Windows, v 4.11.  
168 United States Environmental Protection Agency, Washington, DC, USA.  
169  
170 S23.DiFilippo, EL, RP Eganhouse (2010). Assessment of PDMS-water partition coefficients:  
171 Implications for passive environmental sampling of hydrophobic organic compounds: *Env. Sci*  
172 *Technol.* 44:6971-6925.  
173  
174 S24.Gobas FAPC, Otton SV, Tupper-Ring LF, Crawford MA. 2015. Chemical activity  
175 Calculator for Solid and Liquid Non-Polar Organic Chemicals in Environmental Media. 2015.  
176 Environmental Toxicology Research Group at Simon Fraser University.  
177 <http://www.sfu.ca/rem/toxicology/our-models/activity-calculator.html>.  
178  
179

180 **Supporting Information for Inserts**

181

182 In inserts A and B, chemical activities are derived from the concentration data by dividing the  
183 concentrations by the “solubilities” of chemical A and B in the media in which the chemical was  
184 reported (Table 1 and 2). The solubilities of chemical A and B in the various media are  
185 calculated using the chemical activity calculator [S24] using the following input parameters:

186 Ambient Water and NOEC-water:

187 Concentration of particulate matter in water: 0 kg/L

188 Concentration of lipid in water: 0 kg/L

189 Concentration of protein in water: 0 kg/L

190 Salinity: 0 mol/L

191 Waste Water Effluent:

192 Concentration of particulate matter in water: 0 kg/L

193 Concentration of lipid in water: 0.01 kg/L

194 Concentration of protein in water: 0 kg/L

195 Salinity: 0 mol/L

196 In-vitro Bioassay:

197 Concentration of particulate matter in water: 0 kg/L

198 Concentration of lipid in water: 0.005 kg/L

199 Concentration of protein in water: 0 kg/L

200 Salinity: 0 mol/L

201 Sediment:

202 Organic carbon content of sediment particles: 0.01 kg/kg

203 Invertebrates:

204 Lipid content: 0.01 kg/kg

205 Protein content: 0 kg/kg

206 Carbohydrate content: 0 kg/kg

207 Fish:

208 Lipid content: 0.04 kg/kg

209 Protein content: 0 kg/kg

210 Carbohydrate content: 0 kg/kg

211 Fish Eating Mammal:

212 Lipid content: 0.20 kg/kg

213 Protein content: 0 kg/kg

214 Carbohydrate content: 0 kg/kg

215

216 For simplicity, the temperature of all media was assumed to be 25°C. The default parameters for  
217 the densities are used. Densities of water, lipids, organic carbon, protein and sediment particulate  
218 matter are respectively, 1, 0.9, 1, 0.9 and 1.2 kg/L.

219

220

221
